# Supplementary material for: Effort and Substance Use: Differentiating Tobacco Use Through Reinforcement Learning of Effort Based Decision Making
Source: Research Square preprint supplement (doi:10.21203/rs.3.rs-8928184/v1), 2026-03-17

**Effort and Substance Use: Differentiating Tobacco Use Through Reinforcement Learning of Effort Based Decision Making**

**Authors:** Kasey P. Spry1,2, Jazmyne James1, Alison H. Oliveto3, Michael Mancino3, Kenneth T. Kishida1,4,5 † , Merideth A. Addicott1†

**Affiliations:**

1 Department of Translational Neuroscience, Wake Forest University School of Medicine, Winston-Salem, NC, USA

2 Neuroscience Graduate Program, Wake Forest University Graduate School of Arts and Sciences, Winston-Salem, NC, USA

3 Department of Psychiatry , University of Arkansas for Medical Sciences, Little Rock, AR, USA

4 Department of Biology, Wake Forest University, Winston-Salem, NC, USA

5 Department of Neurosurgery, Wake Forest University School of Medicine, Winston-Salem, NC, USA

† Merideth A. Addicott and Kenneth T. Kishida are co-senior authors

**Corresponding Authors:**

Kasey P. Spry: [kasey.spry@wfusm.edu](mailto:kasey.spry@wfusm.edu)

Merideth A. Addicott: [Merideth.Addicott@wfusm.edu](mailto:Merideth.Addicott@wfusm.edu)

**SUPPLEMENTAL METHODS, RESULTS AND FIGURES**

**EEfRT Performance**

Participants performed an average of 65.2 trials during the 20 minutes of the EEfRT (SD = 7.5, range 51 – 87 trials). One-way ANOVA analyses revealed groups did not differ on the number of total trials (F(3,96) = 1.191, p = 0.317).

Within the first 50 trials, participants made high-effort selections in 33.4% of trials, the average completion rate for high effort task selections was 79.9%, and the average completion rate for low effort task selection was 96.4%. One-way ANOVA analyses revealed groups did not differ in high effort task selection (F(3,96) = 1.094, p = 0.355), low effort task selection (F(3,96) = 1.094, p = 0.355), high effort task completion rate (F(3,96) = 0.491, p = 0.689), or low effort task completion (F(3,96) = 0.375, p = 0.771).

**Participant Demographics and TDRL Posterior Parameters**

We investigated if there were relationships between demographics and TDRL posterior parameters as groups differed in three demographic categories (age (F(3,96) = 13.88, p < 0.001), years of education (F(3,96) = 6.40, p < 0.001), and racial distribution (𝛘2(12) = 42.80, p < 0.001); Table 1). Individual-level TDRL parameter estimates, maximum a posteriori estimate (MAP; the parameter value that maximizes the posterior distribution i.e. the mode of the posterior) were used as a summary statistic for each participant. Pearson correlations were conducted to assess the relationship of TDRL parameters with continuous variables and one-way analysis of variance (ANOVA) to assess the relationship of TDRL parameters with categorical variables. When assessing race, participants that identified as American Indian, Asian, Black, and other were grouped together in an overall Minority group due to the limited numbers of some racial categories.

Learnrate (α) did not have a significant relationship with age (r(98) = -0.127, p-value = 0.209), years of education (r(98) = 0.021, p-value = 0.838), nor racial distribution (F(1,98) = 0.098, p-value = 0.755). Discount factor (γ) did have a significant relationship with age (r(98) = -0.204, p-value = 0.042; Supplemental Fig. 2A), years of education (r(98) = -0.197, p-value = 0.050; Supplemental Fig. 2B), and racial distribution (F(1,98) = 19.92, p-value < 0.001; Supplemental Fig. 2C). Inverse choice temperature (β) did have a significant relationship with racial distribution (F(1,98) = 15.05, p-value < 0.001; Supplemental Fig. 2D) and but did not have a significant relationship with age (r(98) = -0.190, p-value = 0.058) nor years of education (r(98) = -0.193, p-value = 0.054).

**Model Recovery and Parameter Recovery**

To validate that the models considered in this study (TDRL, Full SV, and Reward Only SV models) could be reliably distinguished and that our model comparison analysis is able to accurately identify the true generative model of choice behavior on the EEfRT, we performed a model recovery analysis. For this model recovery analysis, we simulated choice behavior on the EEfRT for all participants using the MAP individual-level parameter values for TDRL, Full SV, and Reward Only SV models and then computed model comparison criteria to determine whether the model comparison analysis identified the true generative model. Across all three generative models, the recovery results showed a consistent pattern: TDRL was the best‑fitting model regardless of the model used to generate the data (Supplemental Table 3). This pattern indicates that TDRL can approximate the behavioral patterns produced by both simpler models, whereas the simpler models cannot approximate the dynamics captured by TDRL. Rather than indicating a flaw in TDRL this pattern reflects the relationship between these models: TDRL is a more flexible, more general, and biologically grounded as seen in the literature. This finding aligns with the literature showing extensive behavioral and neural evidence that temporal difference learning is the mechanism by which reward prediction and decision making occur.

This model recovery analysis also suggests that Full SV and Reward Only SV models are useful as descriptive models, but they might not fully capture the cognitive and neural mechanisms of decision making in the EEfRT whereas TDRL provides a mechanistic account of decision making captured in the EEfRT. Altogether this model recovery analysis shows that even if participants choice behavior resembles these descriptive models, this choice behavior is still best understood as arising from the underlying temporal-difference learning mechanisms rather than from fundamentally distinct computational mechanisms.

To validate that our model fitting procedure is able to accurately estimate model parameters for each participant, we performed a parameter recovery analysis. We first calculated the MAP for each parameter for each participant to simulate choice datasets (n = 100) on the EEfRT. The TDRL model was refitted to the simulated datasets and then we computed the Pearson’s correlation coefficient between the MAP of the model parameters fitted to the actual participant data and the simulated data. All model parameters are recoverable with statistically significant moderate to strong correlations (Supplemental Table 4).


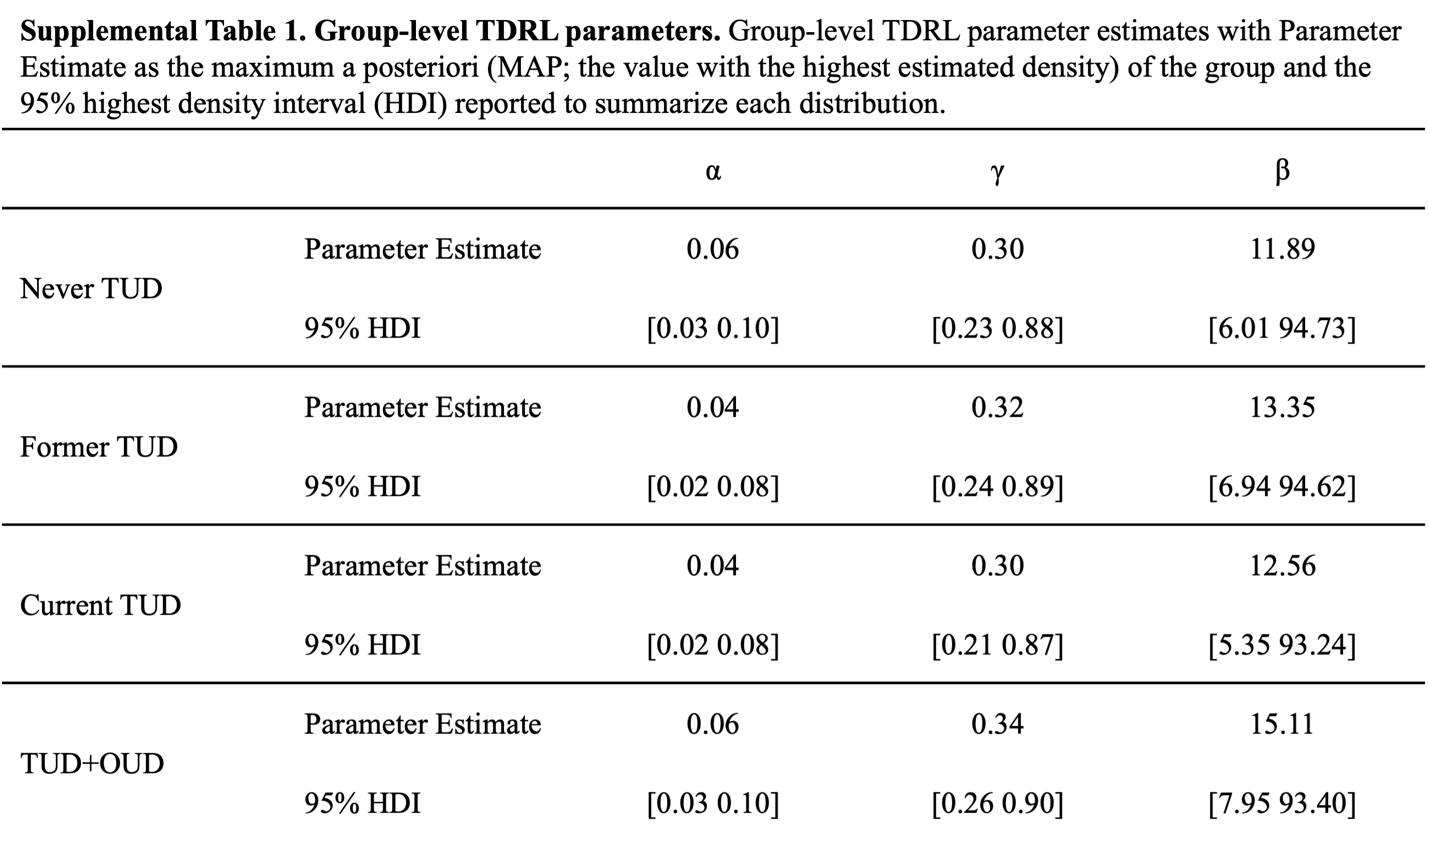

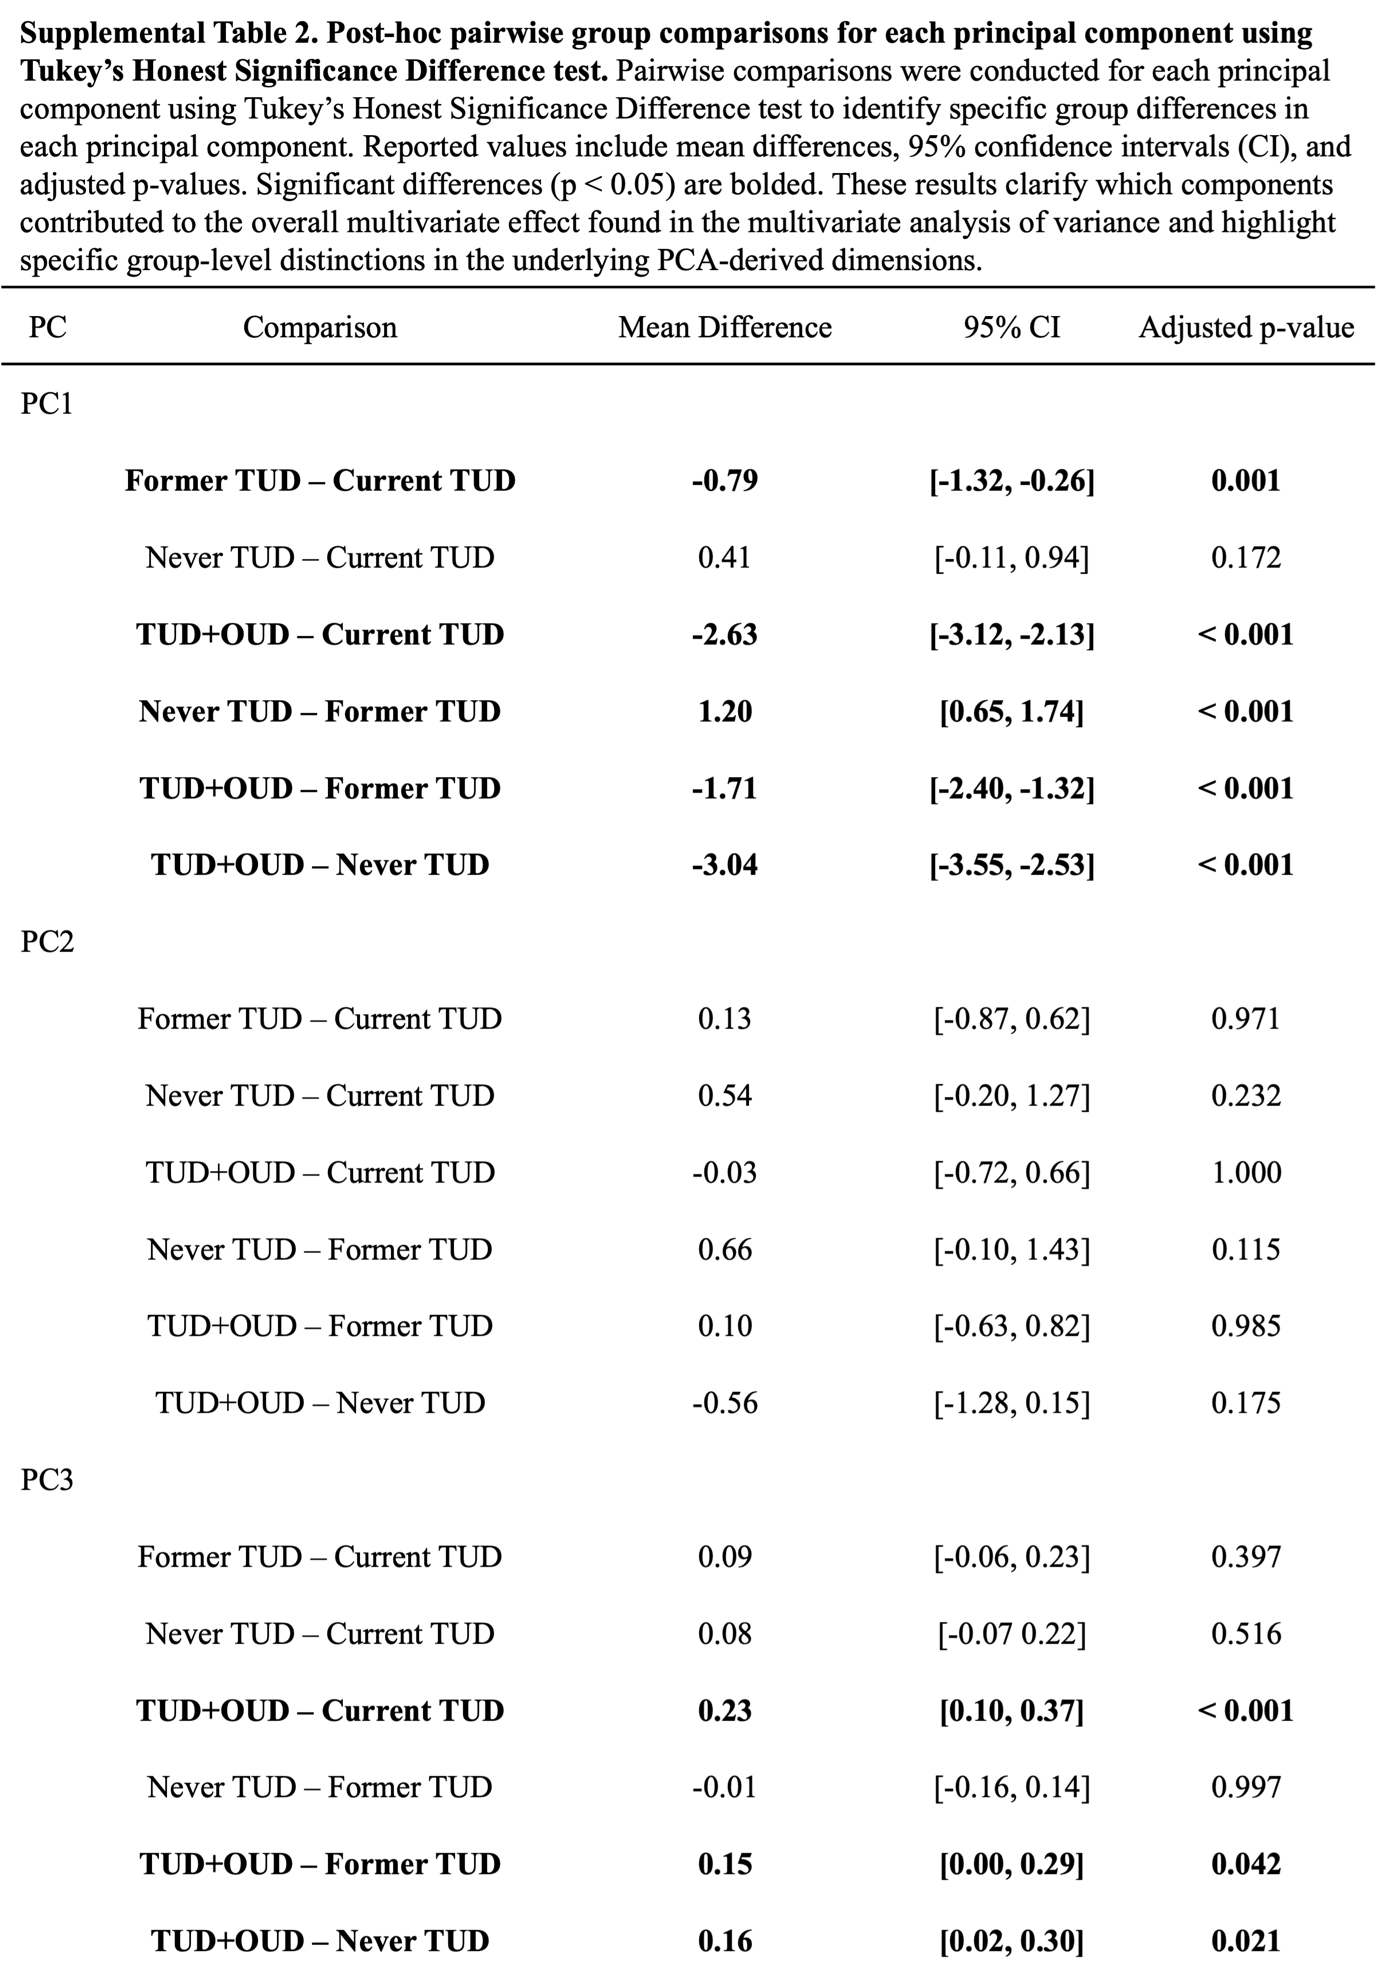


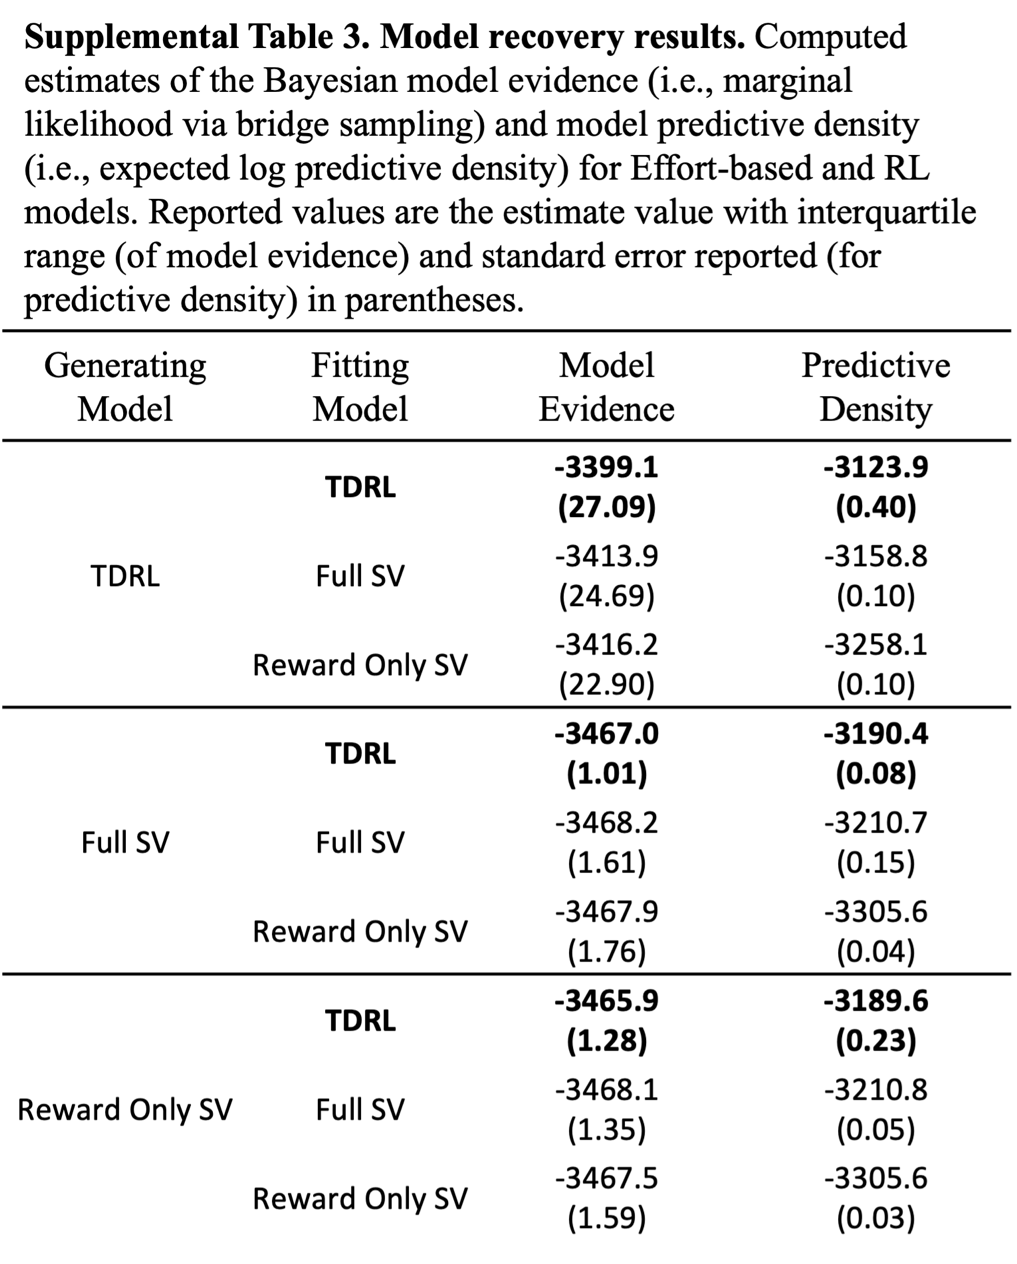


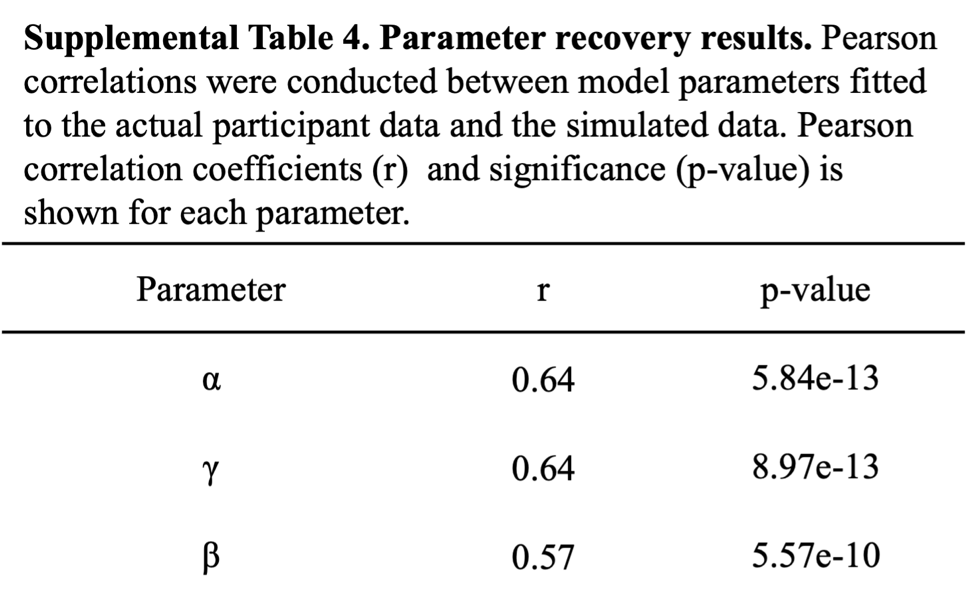


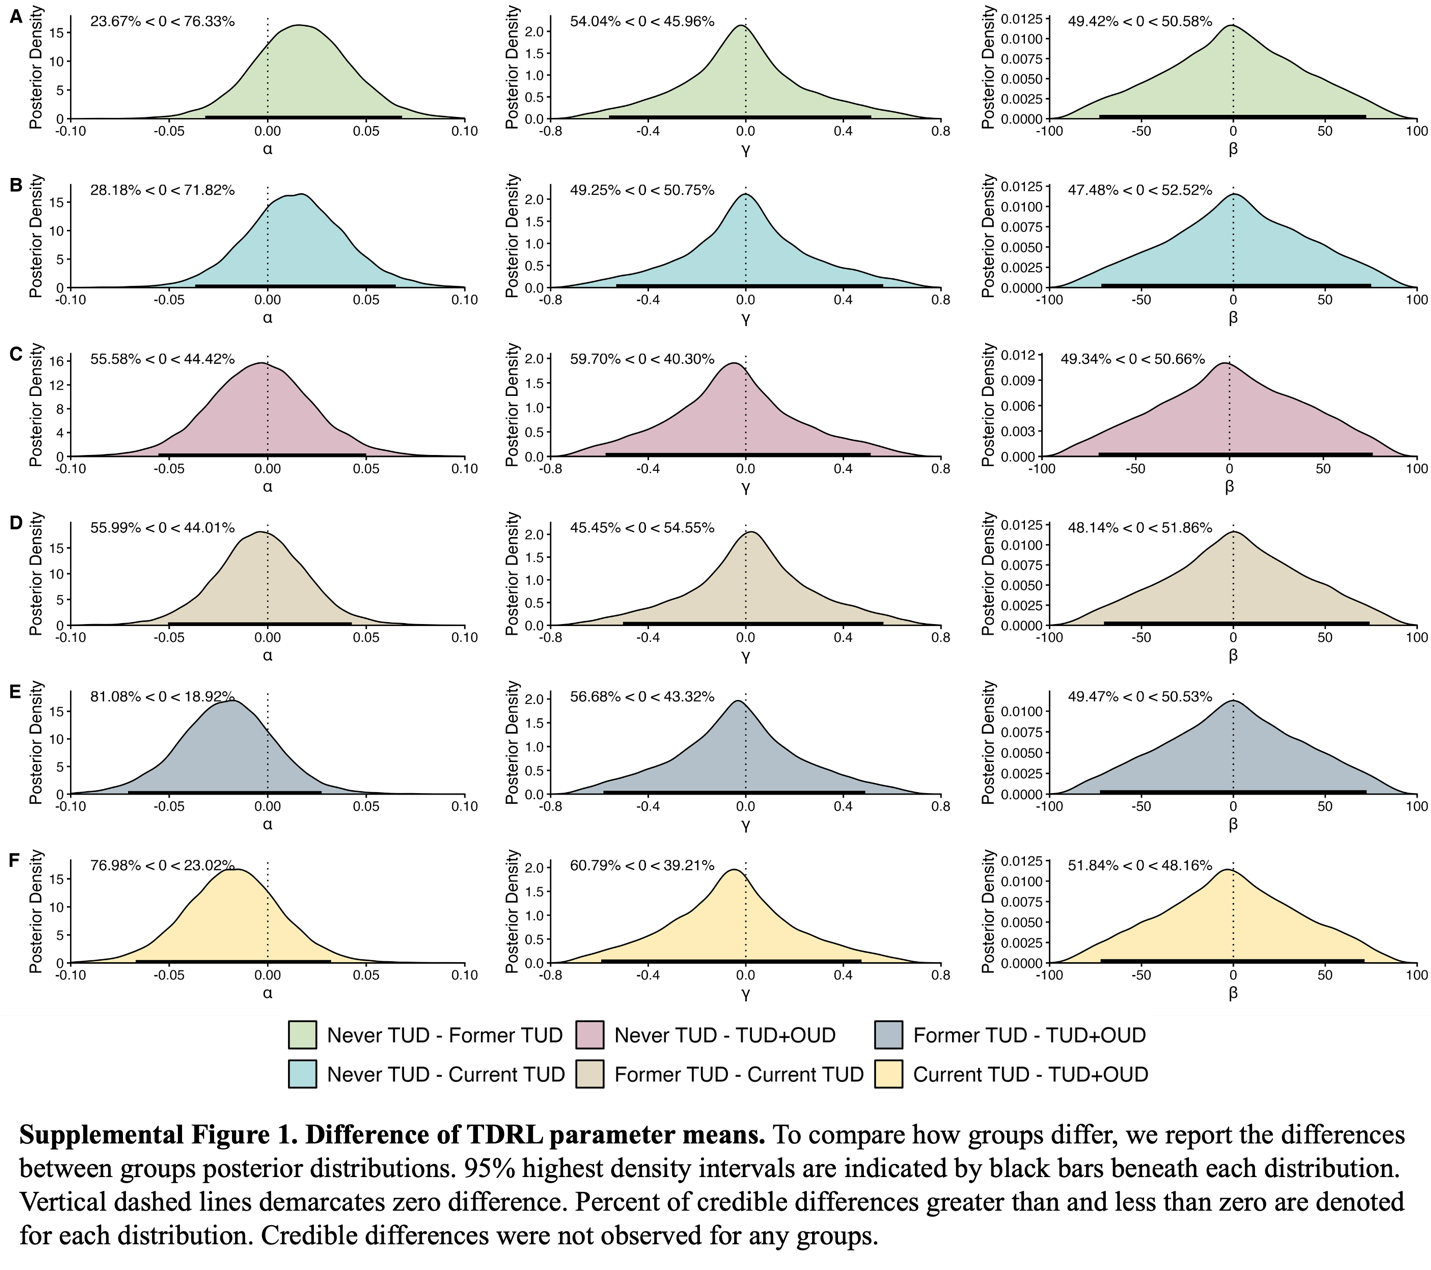

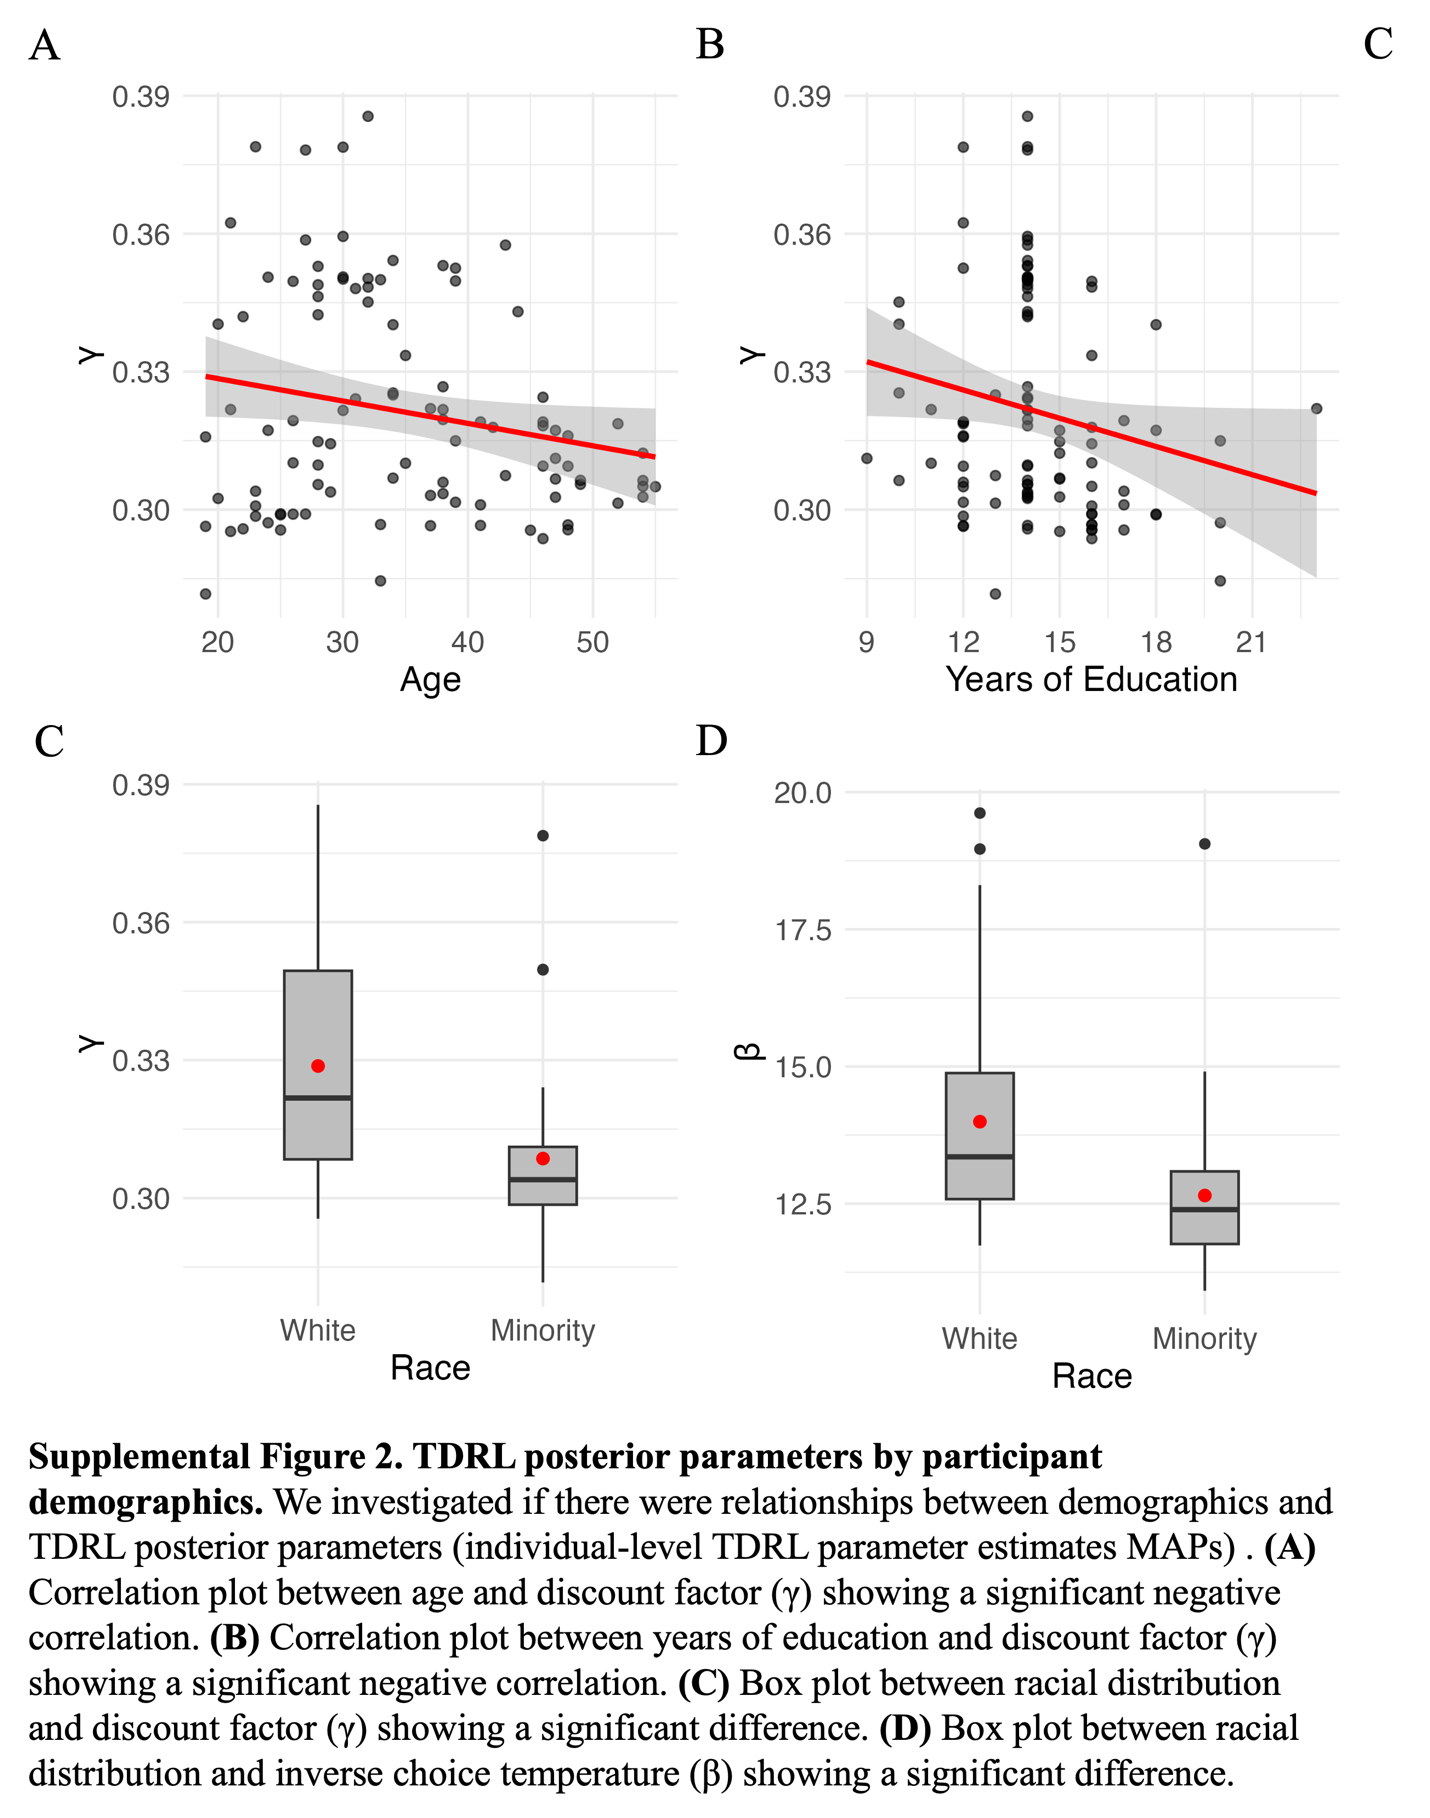

Supplement: Supplementary file 1 [file d72a628cd26865b034ea526b.docx]
